# Supplementary material for: Loss of RASSF4 Expression in Multiple Myeloma Promotes RAS-Driven Malignant Progression
Source: Oxford University Press journal article supplement (doi:10.1158/0008-5472.can-17-1544), 2017-12-19
Supplement: 00085472can171544-sup-183803_2_supp_4419176_p06d8d.xlsx [file 00085472can171544-sup-183803_2_supp_4419176_p06d8d.xlsx]

## Sheet: Supplemental Table S2.txt
Supplemental Table S2: List of differentially expressed genes between all control and RASSF4 overexpressing human multiple myeloma cell line
Ensembl ID	Gene name	Description	Mean Expression	Log2 Fold Change	Adjusted p-value
ENSG00000132965	ALOX5AP	arachidonate 5-lipoxygenase-activating protein [Source:HGNC Symbol;Acc:436]	319.105	-2.53748	3.57869e-18
ENSG00000249003	CLUHP4	clustered mitochondria (cluA/CLU1) homolog pseudogene 4 [Source:HGNC Symbol;Acc:38470]	191.983	-2.51543	1.26204e-14
ENSG00000122224	LY9	lymphocyte antigen 9 [Source:HGNC Symbol;Acc:6730]	714.876	-2.00328	1.40621e-12
ENSG00000259029	DUX4L18	double homeobox 4 like 18 [Source:HGNC Symbol;Acc:37716]	90.083	-2.13031	4.03149e-10
ENSG00000170965	PLAC1	placenta-specific 1 [Source:HGNC Symbol;Acc:9044]	376.867	-2.03749	2.57228e-09
ENSG00000170476	MZB1	marginal zone B and B1 cell-specific protein [Source:HGNC Symbol;Acc:30125]	13660.1	-1.26716	2.57728e-09
ENSG00000230468	CLUHP5	clustered mitochondria (cluA/CLU1) homolog pseudogene 5 [Source:HGNC Symbol;Acc:38471]	135.663	-1.85622	1.16544e-07
ENSG00000130707	ASS1	argininosuccinate synthase 1 [Source:HGNC Symbol;Acc:758]	1605.05	-1.82989	1.16544e-07
ENSG00000204389	HSPA1A	heat shock 70kDa protein 1A [Source:HGNC Symbol;Acc:5232]	7421.66	1.03955	1.16544e-07
ENSG00000184545	DUSP8	dual specificity phosphatase 8 [Source:HGNC Symbol;Acc:3074]	137.245	1.82439	1.18662e-07
ENSG00000204388	HSPA1B	heat shock 70kDa protein 1B [Source:HGNC Symbol;Acc:5233]	4908.19	1.04004	1.40349e-07
ENSG00000128965	CHAC1	ChaC, cation transport regulator homolog 1 (E. coli) [Source:HGNC Symbol;Acc:28680]	1547.93	-1.59868	4.39063e-07
ENSG00000107485	GATA3	GATA binding protein 3 [Source:HGNC Symbol;Acc:4172]	517.282	1.26562	7.94974e-07
ENSG00000177606	JUN	jun proto-oncogene [Source:HGNC Symbol;Acc:6204]	2839.84	1.61071	9.51246e-07
ENSG00000258991	DUX4L19	double homeobox 4 like 19 [Source:HGNC Symbol;Acc:37718]	56.3581	-1.69887	2.05082e-06
ENSG00000099958	DERL3	derlin 3 [Source:HGNC Symbol;Acc:14236]	3159.04	-1.13323	2.51578e-06
ENSG00000163536	SERPINI1	serpin peptidase inhibitor, clade I (neuroserpin), member 1 [Source:HGNC Symbol;Acc:8943]	359.92	-1.09915	2.74122e-05
ENSG00000126353	CCR7	chemokine (C-C motif) receptor 7 [Source:HGNC Symbol;Acc:1608]	138.2	1.58186	2.74122e-05
ENSG00000132432	SEC61G	Sec61 gamma subunit [Source:HGNC Symbol;Acc:18277]	3209.45	-0.901102	3.78645e-05
ENSG00000154589	LY96	lymphocyte antigen 96 [Source:HGNC Symbol;Acc:17156]	183.174	-1.40061	6.64761e-05
ENSG00000108176	DNAJC12	DnaJ (Hsp40) homolog, subfamily C, member 12 [Source:HGNC Symbol;Acc:28908]	235.873	-1.23172	6.73311e-05
ENSG00000232783			230.655	-1.50719	7.84385e-05
ENSG00000144481	TRPM8	transient receptor potential cation channel, subfamily M, member 8 [Source:HGNC Symbol;Acc:17961]	1356.09	-1.39621	9.325e-05
ENSG00000051108	HERPUD1	homocysteine-inducible, endoplasmic reticulum stress-inducible, ubiquitin-like domain member 1 [Source:HGNC Symbol;Acc:13744]	12032.9	-1.20269	9.75496e-05
ENSG00000136068	FLNB	filamin B, beta [Source:HGNC Symbol;Acc:3755]	4472.25	0.935748	0.000125643
ENSG00000167476	JSRP1	junctional sarcoplasmic reticulum protein 1 [Source:HGNC Symbol;Acc:24963]	894.391	-1.14133	0.000133472
ENSG00000052749	RRP12	ribosomal RNA processing 12 homolog (S. cerevisiae) [Source:HGNC Symbol;Acc:29100]	2817.9	0.863882	0.000179382
ENSG00000117461	PIK3R3	phosphoinositide-3-kinase, regulatory subunit 3 (gamma) [Source:HGNC Symbol;Acc:8981]	654.014	0.9191	0.000179382
ENSG00000162894	FAIM3	Fas apoptotic inhibitory molecule 3 [Source:HGNC Symbol;Acc:14315]	597.908	-1.00774	0.000204644
ENSG00000198624	CCDC69	coiled-coil domain containing 69 [Source:HGNC Symbol;Acc:24487]	4532.18	-0.834354	0.000214885
ENSG00000070540	WIPI1	WD repeat domain, phosphoinositide interacting 1 [Source:HGNC Symbol;Acc:25471]	2745.57	-1.11677	0.000225337
ENSG00000198856	OSTC	oligosaccharyltransferase complex subunit (non-catalytic) [Source:HGNC Symbol;Acc:24448]	6349.21	-0.897458	0.000225337
ENSG00000129128	SPCS3	signal peptidase complex subunit 3 homolog (S. cerevisiae) [Source:HGNC Symbol;Acc:26212]	12001.1	-0.791451	0.000225337
ENSG00000138131	LOXL4	lysyl oxidase-like 4 [Source:HGNC Symbol;Acc:17171]	1139.33	-1.33622	0.000246679
ENSG00000139269	INHBE	inhibin, beta E [Source:HGNC Symbol;Acc:24029]	1685.26	-1.39238	0.000350594
ENSG00000167077	MEI1	meiosis inhibitor 1 [Source:HGNC Symbol;Acc:28613]	414.028	-1.18513	0.000457184
ENSG00000114200	BCHE	butyrylcholinesterase [Source:HGNC Symbol;Acc:983]	428.626	-1.38352	0.000473154
ENSG00000166598	HSP90B1	heat shock protein 90kDa beta (Grp94), member 1 [Source:HGNC Symbol;Acc:12028]	84975.5	-0.906452	0.000473154
ENSG00000123131	PRDX4	peroxiredoxin 4 [Source:HGNC Symbol;Acc:17169]	4713.86	-0.876368	0.000473154
ENSG00000211632	IGKV3D-11	immunoglobulin kappa variable 3D-11 [Source:HGNC Symbol;Acc:5823]	3333.89	-1.07016	0.000638936
ENSG00000146416	AIG1	androgen-induced 1 [Source:HGNC Symbol;Acc:21607]	1524.49	-0.966844	0.000638936
ENSG00000242265	PEG10	paternally expressed 10 [Source:HGNC Symbol;Acc:14005]	13421.2	1.06334	0.000845013
ENSG00000152256	PDK1	pyruvate dehydrogenase kinase, isozyme 1 [Source:HGNC Symbol;Acc:8809]	5756.82	-0.877836	0.000910853
ENSG00000038002	AGA	aspartylglucosaminidase [Source:HGNC Symbol;Acc:318]	1791.39	-0.836634	0.000910853
ENSG00000143870	PDIA6	protein disulfide isomerase family A, member 6 [Source:HGNC Symbol;Acc:30168]	27012.7	-0.797332	0.000910853
ENSG00000104765	BNIP3L	BCL2/adenovirus E1B 19kDa interacting protein 3-like [Source:HGNC Symbol;Acc:1085]	3854.73	-0.763601	0.000910853
ENSG00000166016	ABTB2	ankyrin repeat and BTB (POZ) domain containing 2 [Source:HGNC Symbol;Acc:23842]	705.799	0.883006	0.000910853
ENSG00000136732	GYPC	glycophorin C (Gerbich blood group) [Source:HGNC Symbol;Acc:4704]	2477.55	-0.882613	0.000919669
ENSG00000196189	SEMA4A	sema domain, immunoglobulin domain (Ig), transmembrane domain (TM) and short cytoplasmic domain, (semaphorin) 4A [Source:HGNC Symbol;Acc:10729]	1964.45	-1.04812	0.00100391
ENSG00000119729	RHOQ	ras homolog family member Q [Source:HGNC Symbol;Acc:17736]	2212.9	-0.962052	0.00100391
ENSG00000145287	PLAC8	placenta-specific 8 [Source:HGNC Symbol;Acc:19254]	856.585	-1.14967	0.00104683
ENSG00000100196	KDELR3	KDEL (Lys-Asp-Glu-Leu) endoplasmic reticulum protein retention receptor 3 [Source:HGNC Symbol;Acc:6306]	191.946	-1.16829	0.00105283
ENSG00000166794	PPIB	peptidylprolyl isomerase B (cyclophilin B) [Source:HGNC Symbol;Acc:9255]	8594.07	-0.867736	0.00107117
ENSG00000137563	GGH	gamma-glutamyl hydrolase (conjugase, folylpolygammaglutamyl hydrolase) [Source:HGNC Symbol;Acc:4248]	6445.21	-0.876533	0.00146101
ENSG00000180879	SSR4	signal sequence receptor, delta [Source:HGNC Symbol;Acc:11326]	9062.48	-0.859262	0.00148094
ENSG00000106537	TSPAN13	tetraspanin 13 [Source:HGNC Symbol;Acc:21643]	947.007	-0.788182	0.00152066
ENSG00000229191			68.4491	-1.2902	0.00169356
ENSG00000151012	SLC7A11	solute carrier family 7 (anionic amino acid transporter light chain, xc- system), member 11 [Source:HGNC Symbol;Acc:11059]	1798.96	-1.21232	0.00169356
ENSG00000123095	BHLHE41	basic helix-loop-helix family, member e41 [Source:HGNC Symbol;Acc:16617]	2042.98	0.994378	0.00173551
ENSG00000141664	ZCCHC2	zinc finger, CCHC domain containing 2 [Source:HGNC Symbol;Acc:22916]	533.378	0.997897	0.00173551
ENSG00000196517	SLC6A9	solute carrier family 6 (neurotransmitter transporter, glycine), member 9 [Source:HGNC Symbol;Acc:11056]	1130.2	-1.13455	0.00174278
ENSG00000135919	SERPINE2	serpin peptidase inhibitor, clade E (nexin, plasminogen activator inhibitor type 1), member 2 [Source:HGNC Symbol;Acc:8951]	1557.56	-0.998116	0.00174278
ENSG00000107551	RASSF4	Ras association (RalGDS/AF-6) domain family member 4 [Source:HGNC Symbol;Acc:20793]	14274.4	1.22146	0.00174278
ENSG00000163131	CTSS	cathepsin S [Source:HGNC Symbol;Acc:2545]	5772.35	-0.814955	0.00185554
ENSG00000168209	DDIT4	DNA-damage-inducible transcript 4 [Source:HGNC Symbol;Acc:24944]	1933.62	-0.809621	0.00185554
ENSG00000117091	CD48	CD48 molecule [Source:HGNC Symbol;Acc:1683]	9189.73	-0.879436	0.00187025
ENSG00000104231	ZFAND1	zinc finger, AN1-type domain 1 [Source:HGNC Symbol;Acc:25858]	3263.63	-0.74653	0.00206583
ENSG00000136010	ALDH1L2	aldehyde dehydrogenase 1 family, member L2 [Source:HGNC Symbol;Acc:26777]	6813.36	-1.1733	0.00214159
ENSG00000124766	SOX4	SRY (sex determining region Y)-box 4 [Source:HGNC Symbol;Acc:11200]	1347.69	0.78089	0.00214159
ENSG00000186174	BCL9L	B-cell CLL/lymphoma 9-like [Source:HGNC Symbol;Acc:23688]	445.57	0.827356	0.00214159
ENSG00000168675	LDLRAD4	low density lipoprotein receptor class A domain containing 4 [Source:HGNC Symbol;Acc:1224]	561.825	1.1528	0.00230477
ENSG00000133216	EPHB2	EPH receptor B2 [Source:HGNC Symbol;Acc:3393]	872.643	0.971075	0.00244517
ENSG00000155093	PTPRN2	protein tyrosine phosphatase, receptor type, N polypeptide 2 [Source:HGNC Symbol;Acc:9677]	464.998	-1.20796	0.00246173
ENSG00000210135	MT-TN	mitochondrially encoded tRNA asparagine [Source:HGNC Symbol;Acc:7493]	625.304	-0.896964	0.00277061
ENSG00000177374	HIC1	hypermethylated in cancer 1 [Source:HGNC Symbol;Acc:4909]	446.003	0.893202	0.00277061
ENSG00000070669	ASNS	asparagine synthetase (glutamine-hydrolyzing) [Source:HGNC Symbol;Acc:753]	12171.5	-1.0574	0.00278475
ENSG00000180964	TCEAL8	transcription elongation factor A (SII)-like 8 [Source:HGNC Symbol;Acc:28683]	1583.53	-0.735298	0.00311983
ENSG00000178965	C1orf173	chromosome 1 open reading frame 173 [Source:HGNC Symbol;Acc:25346]	49.7427	1.21623	0.00311983
ENSG00000135404	CD63	CD63 molecule [Source:HGNC Symbol;Acc:1692]	8521.48	-0.70109	0.00315156
ENSG00000167004	PDIA3	protein disulfide isomerase family A, member 3 [Source:HGNC Symbol;Acc:4606]	18949.1	-0.841154	0.00401481
ENSG00000261652	C15orf65	chromosome 15 open reading frame 65 [Source:HGNC Symbol;Acc:44654]	153.731	-1.14252	0.00403388
ENSG00000128165	ADM2	adrenomedullin 2 [Source:HGNC Symbol;Acc:28898]	1035.27	-0.976754	0.00403388
ENSG00000241794	SPRR2A	small proline-rich protein 2A [Source:HGNC Symbol;Acc:11261]	1588.7	-1.16378	0.00429957
ENSG00000134825	TMEM258	transmembrane protein 258 [Source:HGNC Symbol;Acc:1164]	2364.65	-0.709003	0.00429957
ENSG00000164211	STARD4	StAR-related lipid transfer (START) domain containing 4 [Source:HGNC Symbol;Acc:18058]	878.601	-0.919065	0.00431435
ENSG00000074842	C19orf10	chromosome 19 open reading frame 10 [Source:HGNC Symbol;Acc:16948]	6911.4	-0.82762	0.00431435
ENSG00000211895	IGHA1	immunoglobulin heavy constant alpha 1 [Source:HGNC Symbol;Acc:5478]	106902	-1.01934	0.00467731
ENSG00000115211	EIF2B4	eukaryotic translation initiation factor 2B, subunit 4 delta, 67kDa [Source:HGNC Symbol;Acc:3260]	2125.99	0.715199	0.00472801
ENSG00000052802	MSMO1	methylsterol monooxygenase 1 [Source:HGNC Symbol;Acc:10545]	6966.59	-0.975744	0.0047646
ENSG00000105612	DNASE2	deoxyribonuclease II, lysosomal [Source:HGNC Symbol;Acc:2960]	2436.6	-0.702798	0.0047646
ENSG00000132274	TRIM22	tripartite motif containing 22 [Source:HGNC Symbol;Acc:16379]	953.687	1.16299	0.0047646
ENSG00000270164			6667	-0.754878	0.0047848
ENSG00000126705	AHDC1	AT hook, DNA binding motif, containing 1 [Source:HGNC Symbol;Acc:25230]	448.543	0.814498	0.00501441
ENSG00000165029	ABCA1	ATP-binding cassette, sub-family A (ABC1), member 1 [Source:HGNC Symbol;Acc:29]	1186.83	0.881587	0.00507439
ENSG00000155660	PDIA4	protein disulfide isomerase family A, member 4 [Source:HGNC Symbol;Acc:30167]	14760	-0.956692	0.00516858
ENSG00000184916	JAG2	jagged 2 [Source:HGNC Symbol;Acc:6189]	1511.48	0.741923	0.00527272
ENSG00000110013	SIAE	sialic acid acetylesterase [Source:HGNC Symbol;Acc:18187]	940.15	-0.769407	0.00545664
ENSG00000065911	MTHFD2	methylenetetrahydrofolate dehydrogenase (NADP+ dependent) 2, methenyltetrahydrofolate cyclohydrolase [Source:HGNC Symbol;Acc:7434]	16721	-0.798009	0.00556755
ENSG00000005893	LAMP2	lysosomal-associated membrane protein 2 [Source:HGNC Symbol;Acc:6501]	7050.46	-0.656304	0.0060082
ENSG00000120800	UTP20	UTP20, small subunit (SSU) processome component, homolog (yeast) [Source:HGNC Symbol;Acc:17897]	3012.13	0.765611	0.00604706
ENSG00000099889	ARVCF	armadillo repeat gene deleted in velocardiofacial syndrome [Source:HGNC Symbol;Acc:728]	95.4526	1.17077	0.00612691
ENSG00000068912	ERLEC1	endoplasmic reticulum lectin 1 [Source:HGNC Symbol;Acc:25222]	5333.88	-0.908924	0.00628453
ENSG00000065485	PDIA5	protein disulfide isomerase family A, member 5 [Source:HGNC Symbol;Acc:24811]	2888.46	-0.776259	0.00640447
ENSG00000100814	CCNB1IP1	cyclin B1 interacting protein 1, E3 ubiquitin protein ligase [Source:HGNC Symbol;Acc:19437]	3706.48	-0.668722	0.00640447
ENSG00000139793	MBNL2	muscleblind-like splicing regulator 2 [Source:HGNC Symbol;Acc:16746]	1243.6	-0.938792	0.00646609
ENSG00000181222	POLR2A	polymerase (RNA) II (DNA directed) polypeptide A, 220kDa [Source:HGNC Symbol;Acc:9187]	9560.53	0.792936	0.00646609
ENSG00000117228	GBP1	guanylate binding protein 1, interferon-inducible [Source:HGNC Symbol;Acc:4182]	5527.24	1.14107	0.00646609
ENSG00000100889	PCK2	phosphoenolpyruvate carboxykinase 2 (mitochondrial) [Source:HGNC Symbol;Acc:8725]	3536.62	-0.905225	0.00675195
ENSG00000139626	ITGB7	integrin, beta 7 [Source:HGNC Symbol;Acc:6162]	19231.8	-0.904818	0.00675195
ENSG00000018625	ATP1A2	ATPase, Na+/K+ transporting, alpha 2 polypeptide [Source:HGNC Symbol;Acc:800]	228.891	-1.16114	0.00681841
ENSG00000092621	PHGDH	phosphoglycerate dehydrogenase [Source:HGNC Symbol;Acc:8923]	3639.87	-0.963328	0.00681841
ENSG00000066032	CTNNA2	catenin (cadherin-associated protein), alpha 2 [Source:HGNC Symbol;Acc:2510]	314.74	-1.06411	0.00712226
ENSG00000244038	DDOST	dolichyl-diphosphooligosaccharide--protein glycosyltransferase subunit (non-catalytic) [Source:HGNC Symbol;Acc:2728]	17561.5	-0.720308	0.00712226
ENSG00000170348	TMED10	transmembrane emp24-like trafficking protein 10 (yeast) [Source:HGNC Symbol;Acc:16998]	20281	-0.685258	0.00712226
ENSG00000112237	CCNC	cyclin C [Source:HGNC Symbol;Acc:1581]	4134.82	-0.654336	0.007172
ENSG00000184677	ZBTB40	zinc finger and BTB domain containing 40 [Source:HGNC Symbol;Acc:29045]	1688.69	0.811852	0.007172
ENSG00000130508	PXDN	peroxidasin homolog (Drosophila) [Source:HGNC Symbol;Acc:14966]	2819.64	-0.845017	0.00791191
ENSG00000114850	SSR3	signal sequence receptor, gamma (translocon-associated protein gamma) [Source:HGNC Symbol;Acc:11325]	21844.6	-0.794703	0.00814803
ENSG00000243811	APOBEC3D	apolipoprotein B mRNA editing enzyme, catalytic polypeptide-like 3D [Source:HGNC Symbol;Acc:17354]	1588.34	-0.685664	0.00814803
ENSG00000139323	POC1B	POC1 centriolar protein B [Source:HGNC Symbol;Acc:30836]	2890.5	-0.644046	0.00814803
ENSG00000095370	SH2D3C	SH2 domain containing 3C [Source:HGNC Symbol;Acc:16884]	1297.85	-0.728222	0.00824309
ENSG00000164758	MED30	mediator complex subunit 30 [Source:HGNC Symbol;Acc:23032]	1375.81	-0.69764	0.00834471
ENSG00000173221	GLRX	glutaredoxin (thioltransferase) [Source:HGNC Symbol;Acc:4330]	2222.74	-0.686855	0.00860638
ENSG00000111266	DUSP16	dual specificity phosphatase 16 [Source:HGNC Symbol;Acc:17909]	1433.61	0.987542	0.00869411
ENSG00000166562	SEC11C	SEC11 homolog C (S. cerevisiae) [Source:HGNC Symbol;Acc:23400]	15068.6	-0.650961	0.00870577
ENSG00000143368	SF3B4	splicing factor 3b, subunit 4, 49kDa [Source:HGNC Symbol;Acc:10771]	13062.2	0.651033	0.00885168
ENSG00000111641	NOP2	NOP2 nucleolar protein [Source:HGNC Symbol;Acc:7867]	5240.9	0.881061	0.00911006
ENSG00000088298	EDEM2	ER degradation enhancer, mannosidase alpha-like 2 [Source:HGNC Symbol;Acc:15877]	2149.53	-0.782946	0.00914525
ENSG00000150093	ITGB1	integrin, beta 1 (fibronectin receptor, beta polypeptide, antigen CD29 includes MDF2, MSK12) [Source:HGNC Symbol;Acc:6153]	14626.8	-0.622553	0.00914525
ENSG00000102595	UGGT2	UDP-glucose glycoprotein glucosyltransferase 2 [Source:HGNC Symbol;Acc:15664]	1400.44	-0.737415	0.00924366
ENSG00000269378	ITGB1P1	integrin beta 1 pseudogene 1 [Source:HGNC Symbol;Acc:3781]	2325.18	-0.648537	0.00942999
ENSG00000260916	CCPG1	cell cycle progression 1 [Source:HGNC Symbol;Acc:24227]	3777.05	-1.04249	0.00943332
ENSG00000196352	CD55	CD55 molecule, decay accelerating factor for complement (Cromer blood group) [Source:HGNC Symbol;Acc:2665]	2428	-0.853452	0.00962432
ENSG00000160862	AZGP1	alpha-2-glycoprotein 1, zinc-binding [Source:HGNC Symbol;Acc:910]	46.0953	-1.07439	0.0096861
ENSG00000132386	SERPINF1	serpin peptidase inhibitor, clade F (alpha-2 antiplasmin, pigment epithelium derived factor), member 1 [Source:HGNC Symbol;Acc:8824]	11154.3	-0.79804	0.00986187
ENSG00000198860	TSEN15	TSEN15 tRNA splicing endonuclease subunit [Source:HGNC Symbol;Acc:16791]	4777.13	-0.766376	0.0107144
ENSG00000152558	TMEM123	transmembrane protein 123 [Source:HGNC Symbol;Acc:30138]	19456.7	-0.609143	0.010775
ENSG00000131089	ARHGEF9	Cdc42 guanine nucleotide exchange factor (GEF) 9 [Source:HGNC Symbol;Acc:14561]	1181.25	-0.769512	0.0110257
ENSG00000225138			438.862	0.832631	0.0110257
ENSG00000048052	HDAC9	histone deacetylase 9 [Source:HGNC Symbol;Acc:14065]	2100.77	-0.909234	0.0110894
ENSG00000133884	DPF2	D4, zinc and double PHD fingers family 2 [Source:HGNC Symbol;Acc:9964]	4465.3	0.647008	0.011201
ENSG00000013375	PGM3	phosphoglucomutase 3 [Source:HGNC Symbol;Acc:8907]	2185.5	-0.697266	0.0116674
ENSG00000196805	SPRR2B	small proline-rich protein 2B [Source:HGNC Symbol;Acc:11262]	705.154	-1.0858	0.0117968
ENSG00000128590	DNAJB9	DnaJ (Hsp40) homolog, subfamily B, member 9 [Source:HGNC Symbol;Acc:6968]	2601.76	-1.00084	0.0119803
ENSG00000210140	MT-TC	mitochondrially encoded tRNA cysteine [Source:HGNC Symbol;Acc:7477]	1174.71	-0.794539	0.0119803
ENSG00000114948	ADAM23	ADAM metallopeptidase domain 23 [Source:HGNC Symbol;Acc:202]	1544.44	-0.686011	0.0119803
ENSG00000012223	LTF	lactotransferrin [Source:HGNC Symbol;Acc:6720]	322.246	-1.05404	0.0122421
ENSG00000258834	DUX4L4	double homeobox 4 like 4 [Source:HGNC Symbol;Acc:38686]	58.0029	-1.03052	0.0122421
ENSG00000145050	MANF	mesencephalic astrocyte-derived neurotrophic factor [Source:HGNC Symbol;Acc:15461]	8470.75	-0.831803	0.0123036
ENSG00000119899	SLC17A5	solute carrier family 17 (acidic sugar transporter), member 5 [Source:HGNC Symbol;Acc:10933]	813.204	-0.712838	0.0123036
ENSG00000128294	TPST2	tyrosylprotein sulfotransferase 2 [Source:HGNC Symbol;Acc:12021]	1704.19	-0.639767	0.0123036
ENSG00000228784	LINC00954	long intergenic non-protein coding RNA 954 [Source:HGNC Symbol;Acc:48668]	123.398	1.10157	0.0123036
ENSG00000163479	SSR2	signal sequence receptor, beta (translocon-associated protein beta) [Source:HGNC Symbol;Acc:11324]	36276	-0.774051	0.012561
ENSG00000113621	TXNDC15	thioredoxin domain containing 15 [Source:HGNC Symbol;Acc:20652]	2880.56	-0.743288	0.0131201
ENSG00000124201	ZNFX1	zinc finger, NFX1-type containing 1 [Source:HGNC Symbol;Acc:29271]	2487.63	0.62073	0.0140037
ENSG00000211890	IGHA2	immunoglobulin heavy constant alpha 2 (A2m marker) [Source:HGNC Symbol;Acc:5479]	5097.86	-0.955405	0.0142169
ENSG00000108270	AATF	apoptosis antagonizing transcription factor [Source:HGNC Symbol;Acc:19235]	6396.1	0.686923	0.0142897
ENSG00000155304	HSPA13	heat shock protein 70kDa family, member 13 [Source:HGNC Symbol;Acc:11375]	7963.87	-0.907948	0.0149117
ENSG00000261824	LINC00662	long intergenic non-protein coding RNA 662 [Source:HGNC Symbol;Acc:27122]	773.107	-0.789228	0.0155475
ENSG00000182319		Tyrosine-protein kinase SgK223 [Source:UniProtKB/Swiss-Prot;Acc:Q86YV5]	331.486	0.899711	0.0158702
ENSG00000143603	KCNN3	potassium intermediate/small conductance calcium-activated channel, subfamily N, member 3 [Source:HGNC Symbol;Acc:6292]	515.137	-0.94842	0.0160371
ENSG00000134285	FKBP11	FK506 binding protein 11, 19 kDa [Source:HGNC Symbol;Acc:18624]	4120.74	-0.797551	0.0160371
ENSG00000119655	NPC2	Niemann-Pick disease, type C2 [Source:HGNC Symbol;Acc:14537]	2037.36	-0.697014	0.0160371
ENSG00000151461	UPF2	UPF2 regulator of nonsense transcripts homolog (yeast) [Source:HGNC Symbol;Acc:17854]	4666.85	0.65572	0.0160371
ENSG00000137876	RSL24D1	ribosomal L24 domain containing 1 [Source:HGNC Symbol;Acc:18479]	11352.8	-0.684571	0.0168548
ENSG00000113448	PDE4D	phosphodiesterase 4D, cAMP-specific [Source:HGNC Symbol;Acc:8783]	3094.36	-0.806352	0.0169562
ENSG00000154102	C16orf74	chromosome 16 open reading frame 74 [Source:HGNC Symbol;Acc:23362]	122.266	-0.983531	0.0176168
ENSG00000154165	GPR15	G protein-coupled receptor 15 [Source:HGNC Symbol;Acc:4469]	3948.6	0.636585	0.0182776
ENSG00000106803	SEC61B	Sec61 beta subunit [Source:HGNC Symbol;Acc:16993]	5822.92	-0.645559	0.0186552
ENSG00000175061	FAM211A-AS1	FAM211A antisense RNA 1 [Source:HGNC Symbol;Acc:28619]	19837.2	-0.670233	0.0187243
ENSG00000104427	ZC2HC1A	zinc finger, C2HC-type containing 1A [Source:HGNC Symbol;Acc:24277]	1439.11	0.625574	0.0191729
ENSG00000175213	ZNF408	zinc finger protein 408 [Source:HGNC Symbol;Acc:20041]	799.482	0.717182	0.0191729
ENSG00000187908	DMBT1	deleted in malignant brain tumors 1 [Source:HGNC Symbol;Acc:2926]	74.2776	-1.0246	0.0193319
ENSG00000164032	H2AFZ	H2A histone family, member Z [Source:HGNC Symbol;Acc:4741]	14665.6	-0.609368	0.019505
ENSG00000182220	ATP6AP2	ATPase, H+ transporting, lysosomal accessory protein 2 [Source:HGNC Symbol;Acc:18305]	5050.06	-0.588645	0.0197435
ENSG00000134824	FADS2	fatty acid desaturase 2 [Source:HGNC Symbol;Acc:3575]	1446.72	-0.801786	0.0198595
ENSG00000170345	FOS	FBJ murine osteosarcoma viral oncogene homolog [Source:HGNC Symbol;Acc:3796]	290.098	-0.97229	0.0199457
ENSG00000179750	APOBEC3B	apolipoprotein B mRNA editing enzyme, catalytic polypeptide-like 3B [Source:HGNC Symbol;Acc:17352]	4006.38	-0.653297	0.0212277
ENSG00000182985	CADM1	cell adhesion molecule 1 [Source:HGNC Symbol;Acc:5951]	8164.56	-0.587982	0.0216908
ENSG00000151470	C4orf33	chromosome 4 open reading frame 33 [Source:HGNC Symbol;Acc:27025]	536.425	-0.73439	0.0221904
ENSG00000133112	TPT1	tumor protein, translationally-controlled 1 [Source:HGNC Symbol;Acc:12022]	65180.9	-0.620803	0.0224757
ENSG00000186260	MKL2	MKL/myocardin-like 2 [Source:HGNC Symbol;Acc:29819]	1225.73	0.64418	0.0249871
ENSG00000122884	P4HA1	prolyl 4-hydroxylase, alpha polypeptide I [Source:HGNC Symbol;Acc:8546]	4263.65	-0.886365	0.0249919
ENSG00000140795	MYLK3	myosin light chain kinase 3 [Source:HGNC Symbol;Acc:29826]	6160.48	-0.930177	0.0258339
ENSG00000173039	RELA	v-rel avian reticuloendotheliosis viral oncogene homolog A [Source:HGNC Symbol;Acc:9955]	4586.36	0.59777	0.0269923
ENSG00000170004	CHD3	chromodomain helicase DNA binding protein 3 [Source:HGNC Symbol;Acc:1918]	5168.9	0.61625	0.0270494
ENSG00000137161	CNPY3	canopy FGF signaling regulator 3 [Source:HGNC Symbol;Acc:11968]	2024.91	-0.594354	0.0276859
ENSG00000173193	PARP14	poly (ADP-ribose) polymerase family, member 14 [Source:HGNC Symbol;Acc:29232]	3115.77	0.907461	0.0276888
ENSG00000116815	CD58	CD58 molecule [Source:HGNC Symbol;Acc:1688]	2289.87	-0.607941	0.0278618
ENSG00000118705	RPN2	ribophorin II [Source:HGNC Symbol;Acc:10382]	31541.3	-0.693234	0.0281328
ENSG00000258755	DUX4L7	double homeobox 4 like 7 [Source:HGNC Symbol;Acc:37266]	51.7622	-0.946018	0.0288971
ENSG00000013392	RWDD2A	RWD domain containing 2A [Source:HGNC Symbol;Acc:21385]	564.772	-0.703021	0.0288971
ENSG00000204228	HSD17B8	hydroxysteroid (17-beta) dehydrogenase 8 [Source:HGNC Symbol;Acc:3554]	1118.49	-0.643902	0.0288971
ENSG00000160818	GPATCH4	G patch domain containing 4 [Source:HGNC Symbol;Acc:25982]	8378.6	0.719786	0.0288971
ENSG00000081913	PHLPP1	PH domain and leucine rich repeat protein phosphatase 1 [Source:HGNC Symbol;Acc:20610]	740.228	0.670949	0.0294151
ENSG00000155640	C10orf12	chromosome 10 open reading frame 12 [Source:HGNC Symbol;Acc:23420]	421.437	0.696112	0.0300563
ENSG00000163285	GABRG1	gamma-aminobutyric acid (GABA) A receptor, gamma 1 [Source:HGNC Symbol;Acc:4086]	182.757	-0.999726	0.0308107
ENSG00000168615	ADAM9	ADAM metallopeptidase domain 9 [Source:HGNC Symbol;Acc:216]	4265	-0.713569	0.0308107
ENSG00000105939	ZC3HAV1	zinc finger CCCH-type, antiviral 1 [Source:HGNC Symbol;Acc:23721]	5748.96	0.595895	0.0319743
ENSG00000158321	AUTS2	autism susceptibility candidate 2 [Source:HGNC Symbol;Acc:14262]	576.617	0.838365	0.0319743
ENSG00000259154	DUX4L17	double homeobox 4 like 17 [Source:HGNC Symbol;Acc:37717]	38.9664	-0.871489	0.0331175
ENSG00000239998	LILRA2	leukocyte immunoglobulin-like receptor, subfamily A (with TM domain), member 2 [Source:HGNC Symbol;Acc:6603]	208.782	-0.916133	0.0331614
ENSG00000108641	B9D1	B9 protein domain 1 [Source:HGNC Symbol;Acc:24123]	889.676	-0.65093	0.0331614
ENSG00000130254	SAFB2	scaffold attachment factor B2 [Source:HGNC Symbol;Acc:21605]	5210.77	0.704567	0.0337063
ENSG00000129347	KRI1	KRI1 homolog (S. cerevisiae) [Source:HGNC Symbol;Acc:25769]	3240.65	0.634024	0.0344918
ENSG00000116985	BMP8B	bone morphogenetic protein 8b [Source:HGNC Symbol;Acc:1075]	6231.51	-0.841497	0.0345908
ENSG00000150051	MKX	mohawk homeobox [Source:HGNC Symbol;Acc:23729]	398.539	-0.98208	0.0357961
ENSG00000166002	SMCO4	single-pass membrane protein with coiled-coil domains 4 [Source:HGNC Symbol;Acc:24810]	950.227	-0.710151	0.0370472
ENSG00000221947	XKR9	XK, Kell blood group complex subunit-related family, member 9 [Source:HGNC Symbol;Acc:20937]	278.609	-0.995778	0.0370635
ENSG00000116793	PHTF1	putative homeodomain transcription factor 1 [Source:HGNC Symbol;Acc:8939]	1481.91	-0.619687	0.0383199
ENSG00000091490	SEL1L3	sel-1 suppressor of lin-12-like 3 (C. elegans) [Source:HGNC Symbol;Acc:29108]	303.151	-0.850691	0.038414
ENSG00000055211	GINM1	glycoprotein integral membrane 1 [Source:HGNC Symbol;Acc:21074]	1163.44	-0.611285	0.0385284
ENSG00000140044	JDP2	Jun dimerization protein 2 [Source:HGNC Symbol;Acc:17546]	269.449	-0.960245	0.0386191
ENSG00000116761	CTH	cystathionase (cystathionine gamma-lyase) [Source:HGNC Symbol;Acc:2501]	2873.4	-0.92468	0.0388956
ENSG00000104907	TRMT1	tRNA methyltransferase 1 homolog (S. cerevisiae) [Source:HGNC Symbol;Acc:25980]	2829.94	0.679124	0.0388956
ENSG00000180867	PDIA3P1	protein disulfide isomerase family A, member 3 pseudogene 1 [Source:HGNC Symbol;Acc:4607]	1286.88	-0.729035	0.0395637
ENSG00000139289	PHLDA1	pleckstrin homology-like domain, family A, member 1 [Source:HGNC Symbol;Acc:8933]	568.392	0.813078	0.0399521
ENSG00000117500	TMED5	transmembrane emp24 protein transport domain containing 5 [Source:HGNC Symbol;Acc:24251]	6284.23	-0.614417	0.0401595
ENSG00000100813	ACIN1	apoptotic chromatin condensation inducer 1 [Source:HGNC Symbol;Acc:17066]	7998.8	0.599185	0.0412007
ENSG00000226907	CT45A6	cancer/testis antigen family 45, member A6 [Source:HGNC Symbol;Acc:33271]	1771.64	-0.767004	0.0416094
ENSG00000185624	P4HB	prolyl 4-hydroxylase, beta polypeptide [Source:HGNC Symbol;Acc:8548]	38956.2	-0.70901	0.0416094
ENSG00000102471	NDFIP2	Nedd4 family interacting protein 2 [Source:HGNC Symbol;Acc:18537]	2176.2	-0.614754	0.0416094
ENSG00000148840	PPRC1	peroxisome proliferator-activated receptor gamma, coactivator-related 1 [Source:HGNC Symbol;Acc:30025]	4441.34	0.644196	0.0416094
ENSG00000014164	ZC3H3	zinc finger CCCH-type containing 3 [Source:HGNC Symbol;Acc:28972]	1838.49	0.591694	0.0418947
ENSG00000089248	ERP29	endoplasmic reticulum protein 29 [Source:HGNC Symbol;Acc:13799]	12869.5	-0.69277	0.0429199
ENSG00000151135	C12orf23	chromosome 12 open reading frame 23 [Source:HGNC Symbol;Acc:28281]	2108.43	-0.614473	0.0429199
ENSG00000102158	MAGT1	magnesium transporter 1 [Source:HGNC Symbol;Acc:28880]	6074.93	-0.642999	0.0429478
ENSG00000006534	ALDH3B1	aldehyde dehydrogenase 3 family, member B1 [Source:HGNC Symbol;Acc:410]	202.738	-0.820741	0.0434871
ENSG00000115339	GALNT3	UDP-N-acetyl-alpha-D-galactosamine:polypeptide N-acetylgalactosaminyltransferase 3 (GalNAc-T3) [Source:HGNC Symbol;Acc:4125]	2117.74	-0.759364	0.0441972
ENSG00000086598	TMED2	transmembrane emp24 domain trafficking protein 2 [Source:HGNC Symbol;Acc:16996]	15674.1	-0.638005	0.0444404
ENSG00000105732	ZNF574	zinc finger protein 574 [Source:HGNC Symbol;Acc:26166]	800.408	0.642844	0.0449042
ENSG00000178209	PLEC	plectin [Source:HGNC Symbol;Acc:9069]	2987.29	0.625885	0.0450025
ENSG00000102531	FNDC3A	fibronectin type III domain containing 3A [Source:HGNC Symbol;Acc:20296]	3937.53	-0.762349	0.045184
ENSG00000159618	GPR114	G protein-coupled receptor 114 [Source:HGNC Symbol;Acc:19010]	276.593	0.795781	0.0451936
ENSG00000237595			26.5151	-0.963625	0.0453789
ENSG00000171858	RPS21	ribosomal protein S21 [Source:HGNC Symbol;Acc:10409]	19913	-0.601247	0.0453789
ENSG00000132017	DCAF15	DDB1 and CUL4 associated factor 15 [Source:HGNC Symbol;Acc:25095]	2018.82	0.593058	0.0453789
ENSG00000084774	CAD	carbamoyl-phosphate synthetase 2, aspartate transcarbamylase, and dihydroorotase [Source:HGNC Symbol;Acc:1424]	5644.54	0.622169	0.0453789
ENSG00000170819	BFSP2	beaded filament structural protein 2, phakinin [Source:HGNC Symbol;Acc:1041]	171.47	0.852717	0.0453789
ENSG00000224308			96.5638	-0.963592	0.0457371
ENSG00000101670	LIPG	lipase, endothelial [Source:HGNC Symbol;Acc:6623]	1688.97	-0.963306	0.0458282
ENSG00000188897		Protein LOC388210 [Source:UniProtKB/TrEMBL;Acc:I3L099]	257.402	-0.909183	0.0458282
ENSG00000214050	FBXO16	F-box protein 16 [Source:HGNC Symbol;Acc:13618]	293.263	-0.824279	0.0458282
ENSG00000138413	IDH1	isocitrate dehydrogenase 1 (NADP+), soluble [Source:HGNC Symbol;Acc:5382]	2220.1	-0.705652	0.0458282
ENSG00000180574		Putative eukaryotic translation initiation factor 2 subunit 3-like protein [Source:UniProtKB/Swiss-Prot;Acc:Q2VIR3]	897.273	-0.593498	0.0458282
ENSG00000166348	USP54	ubiquitin specific peptidase 54 [Source:HGNC Symbol;Acc:23513]	582.263	0.654324	0.0458282
ENSG00000135547	HEY2	hes-related family bHLH transcription factor with YRPW motif 2 [Source:HGNC Symbol;Acc:4881]	114.733	0.848437	0.0458282
ENSG00000203785	SPRR2E	small proline-rich protein 2E [Source:HGNC Symbol;Acc:11265]	82.7808	-0.96262	0.0461591
ENSG00000141524	TMC6	transmembrane channel-like 6 [Source:HGNC Symbol;Acc:18021]	5103.84	-0.73787	0.0461591
ENSG00000167566	NCKAP5L	NCK-associated protein 5-like [Source:HGNC Symbol;Acc:29321]	28.3143	0.959458	0.0461591
ENSG00000105223	PLD3	phospholipase D family, member 3 [Source:HGNC Symbol;Acc:17158]	4831.87	-0.61781	0.0468326
ENSG00000152402	GUCY1A2	guanylate cyclase 1, soluble, alpha 2 [Source:HGNC Symbol;Acc:4684]	198.198	0.883854	0.0468326
ENSG00000134970	TMED7	transmembrane emp24 protein transport domain containing 7 [Source:HGNC Symbol;Acc:24253]	2294.69	-0.642697	0.0478911
ENSG00000242076	IGKV1-33	immunoglobulin kappa variable 1-33 [Source:HGNC Symbol;Acc:5737]	1536.79	-0.905535	0.0494912
ENSG00000167861	HID1	HID1 domain containing [Source:HGNC Symbol;Acc:15736]	550.853	-0.866938	0.0494912
ENSG00000074695	LMAN1	lectin, mannose-binding, 1 [Source:HGNC Symbol;Acc:6631]	16701.3	-0.675978	0.0494912
ENSG00000105829	BET1	Bet1 golgi vesicular membrane trafficking protein [Source:HGNC Symbol;Acc:14562]	1712.56	-0.664838	0.0494912
ENSG00000198746	GPATCH3	G patch domain containing 3 [Source:HGNC Symbol;Acc:25720]	820.825	0.589656	0.0494912
ENSG00000159140	SON	SON DNA binding protein [Source:HGNC Symbol;Acc:11183]	18432.2	0.590856	0.0494912
ENSG00000146733	PSPH	phosphoserine phosphatase [Source:HGNC Symbol;Acc:9577]	2274.62	-0.724873	0.0496146
ENSG00000187840	EIF4EBP1	eukaryotic translation initiation factor 4E binding protein 1 [Source:HGNC Symbol;Acc:3288]	6230.42	-0.718016	0.0496624
ENSG00000026751	SLAMF7	SLAM family member 7 [Source:HGNC Symbol;Acc:21394]	12427.4	-0.60185	0.0497758
ENSG00000130479	MAP1S	microtubule-associated protein 1S [Source:HGNC Symbol;Acc:15715]	1313.12	0.622429	0.0498398
