# Supplementary material for: Loss of RASSF4 Expression in Multiple Myeloma Promotes RAS-Driven Malignant Progression
Source: Oxford University Press journal article supplement (doi:10.1158/0008-5472.can-17-1544), 2017-12-19
Supplement: 00085472can171544-sup-183803_2_supp_4419177_p06d8d.xlsx [file 00085472can171544-sup-183803_2_supp_4419177_p06d8d.xlsx]

## Sheet: down_regulated_paths.txt
Supplemental Table S3: Pathway enrichment analysis of genes downregulated after RASSF4 overexpression.
Pathways	Adjusted p-value	Gene Ids	Count
Metabolism of proteins	3.97183e-09	BCHE/HERPUD1/KDELR3/WIPI1/ASNS/DNAJB9/HSP90B1/SEC61G/SSR4/PDIA3/MYDGF/PDIA6/SSR3/SPCS3/EDEM2/SSR2/GALNT3/UGGT2/DDOST/EIF4EBP1/SLC17A5/PGM3/RPN2/LMAN1/SEC11C/SEC61B/MAGT1/RPS21/ATP6AP2	29
Unfolded Protein Response (UPR)	7.90671e-07	HERPUD1/KDELR3/WIPI1/ASNS/DNAJB9/HSP90B1/SEC61G/MYDGF/PDIA6/SEC61B	10
SRP-dependent cotranslational protein targeting to membrane	2.61761e-05	SEC61G/SSR4/SSR3/SPCS3/SSR2/DDOST/RPN2/SEC11C/SEC61B/RPS21	10
Translation	3.59362e-05	SEC61G/SSR4/SSR3/SPCS3/SSR2/DDOST/EIF4EBP1/RPN2/SEC11C/SEC61B/RPS21	11
XBP1(S) activates chaperone genes	0.000115	KDELR3/WIPI1/DNAJB9/SEC61G/MYDGF/PDIA6/SEC61B	7
IRE1alpha activates chaperones	0.000138217	KDELR3/WIPI1/DNAJB9/SEC61G/MYDGF/PDIA6/SEC61B	7
Asparagine N-linked glycosylation	0.000200897	PDIA3/EDEM2/UGGT2/DDOST/SLC17A5/PGM3/RPN2/LMAN1/MAGT1	9
Synthesis, secretion, and deacylation of Ghrelin	0.00489939	BCHE/SPCS3/SEC11C	3
Calnexin/calreticulin cycle	0.0059397	PDIA3/EDEM2/UGGT2	3
Trafficking and processing of endosomal TLR	0.00707	HSP90B1/CTSS/CNPY3	3
N-glycan trimming in the ER and Calnexin/Calreticulin cycle	0.00828792	PDIA3/EDEM2/UGGT2	3
Amino acid synthesis and interconversion (transamination)	0.0145182	ASNS/PHGDH/PSPH	3
ER Quality Control Compartment (ERQC)	0.0353304	EDEM2/UGGT2	2
Post-translational protein modification	0.0375487	PDIA3/EDEM2/GALNT3/UGGT2/DDOST/SLC17A5/PGM3/RPN2/LMAN1/MAGT1	10
ATF4 activates genes	0.0375487	HERPUD1/ASNS	2
Synthesis, secretion, and inactivation of Glucagon-like Peptide-1 (GLP-1)	0.0375487	SPCS3/SEC11C	2
Synthesis, secretion, and inactivation of Glucose-dependent Insulinotropic Polypeptide (GIP)	0.0375487	SPCS3/SEC11C	2
Peptide hormone metabolism	0.0429239	BCHE/SPCS3/SEC11C/ATP6AP2	4
Incretin synthesis, secretion, and inactivation	0.0444688	SPCS3/SEC11C	2
